# Supplementary material
Source: Springer Nature journal article supplement (https://www.springermedizin.de/resource/supplementary/13012_2012_506_MOESM3_ESM.pdf/9630192)
Supplement: MOESM3 [file 9630192]

**Additional file 3: Document review framework.** The sensitizing framework used as a guide to extract relevant data from the written documents

- A) Issues regarding the quality of care in the emergency department and their causes
- B) People/groups that are/should be involved in addressing the quality issues in the emergency department
- C) How different people/groups communicate for raising the quality issues in the emergency department and finding ways to improve the quality of care
- D) Initiatives/interventions proposed/executed in order to improve the quality of care in the emergency department
- E) Repeated and/or chronic quality problems in the emergency department
- F) Confirming and/or disconfirming evidence to findings derived from the interviews and the observations
- G) Issues that need to be confirmed/disconfirmed through subsequent interviews and/or observations
